# Supplementary material for: Advancing oxygen evolution reaction efficiency in iron phthalocyanines: axial coordination as a key to structural and electronic tuning
Source: Royal Society of Chemistry journal article supplement (doi:10.1039/d4ta07911f), 2024-12-24
Supplement: d4ta07911f1.pdf [file d4ta07911f1.pdf]

Supplementary Information (SI) for Journal of Materials Chemistry A.

This journal is © The Royal Society of Chemistry 2024

## Supplementary Information

### Advancing Oxygen Evolution Reaction Efficiency in Iron Phthalocyanines: Axial Coordination as a Key to Structural and Electronic Tuning

Jiangdong Bo,<sup>a,#</sup> Yilin Wang,<sup>b,#</sup> Jianghua Wang,<sup>a</sup> Guoxin Zhang,<sup>a</sup> Qian Yu,<sup>b</sup> Xing Fan,<sup>c,\*</sup> Hongbing Lu<sup>a,d,\*</sup>  
and Haiping Lin<sup>a,d,\*</sup>

<sup>a</sup>*School of Physics and Information Technology, Shaanxi Normal University, No. 620, West Chang'an Avenue, Chang'an District, Xi'an, 710119, Shaanxi, PR China.*

<sup>b</sup>*School of Pharmacy, Shandong University of Traditional Chinese Medicine, Jinan250399, China*

<sup>c</sup>*Center for Carbon-based Electronics and Key Laboratory for the Physics and Chemistry of Nanodevices, School of Electronics, Peking University, Beijing 100871, China.*

<sup>d</sup>*Shaanxi "Four Bodies and One Union" University-Enterprise Joint Research Center for Advanced Molybdenum-based Functional Materials*

\*Corresponding author: Haiping Lin; Hongbing Lu; Xing Fan

E-mail address: hplin@snnu.edu.cn; hblu@snnu.edu.cn; xingf@pku.edu.cn

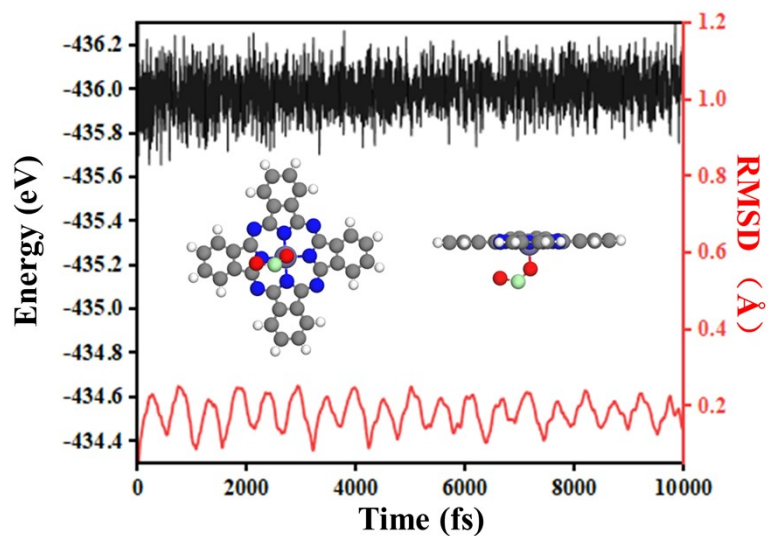

**Figure S1.** The energy variations and root-mean-square deviations (RMSD) of all selected models after the total time of 10 ps at T=300 K.

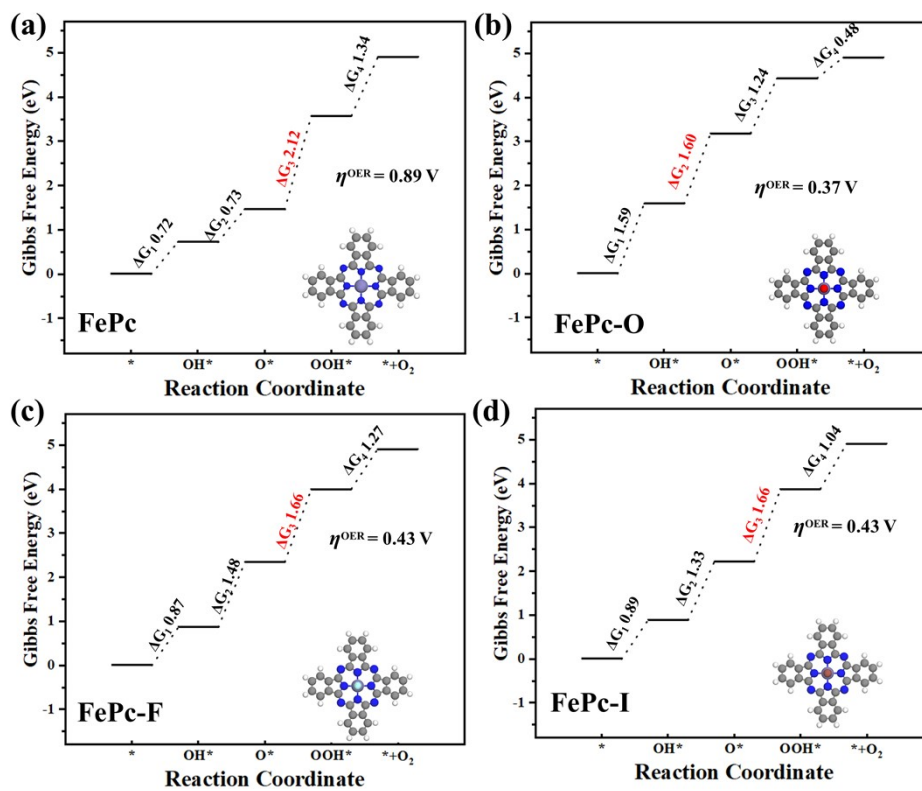

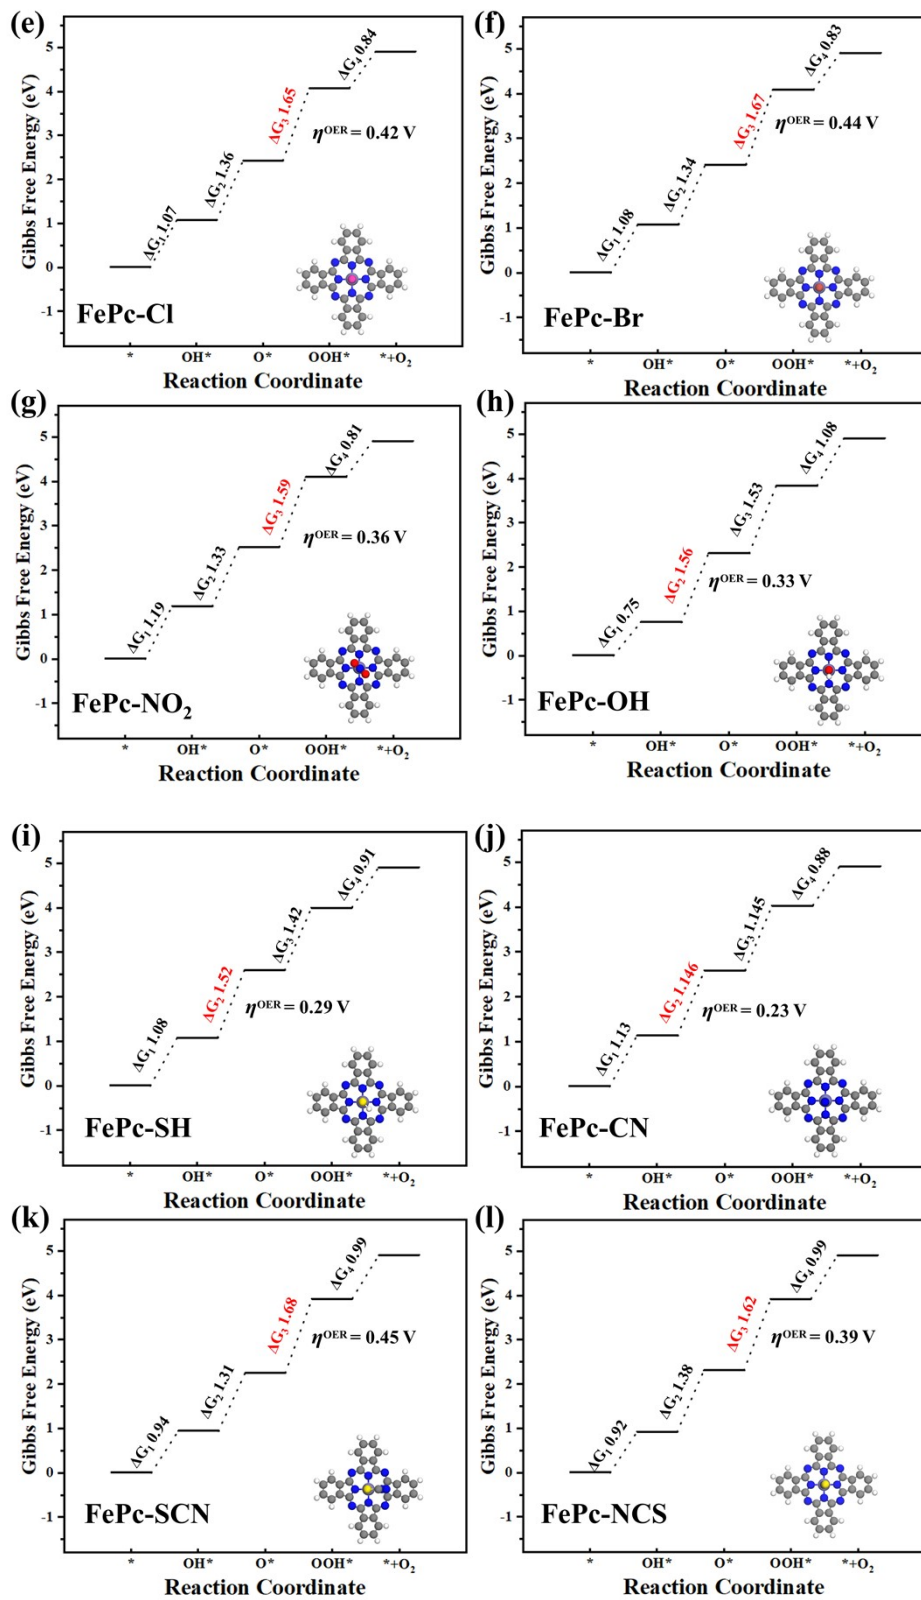

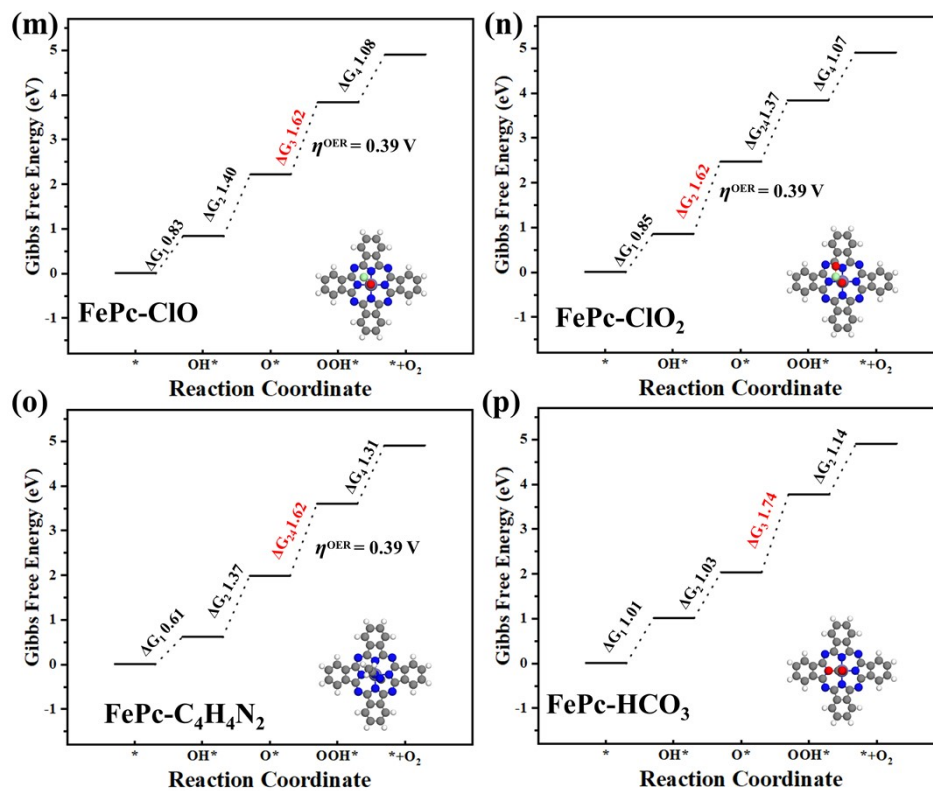

**Figure S2.** The free energy diagrams of OER on the pristine FePc and axially coordinated FePc-Xs.

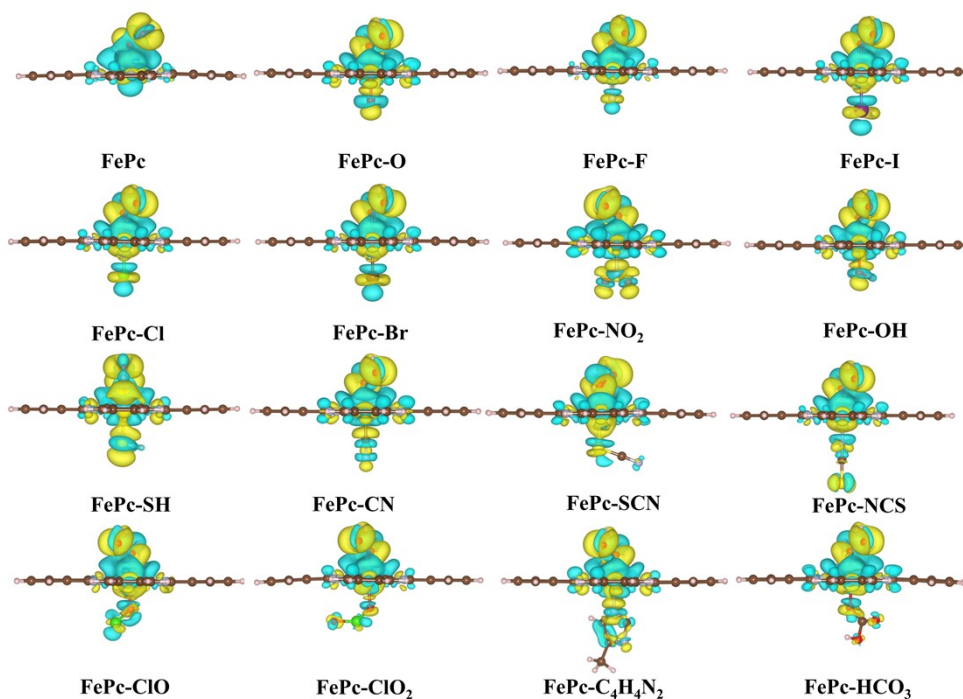

**Figure S3.** Charge density difference for the OOH\* adsorption on the pristine FePc

and axially coordinated FePc-Xs, where the blue and yellow denote the electron depletion and electron accumulation, respectively.

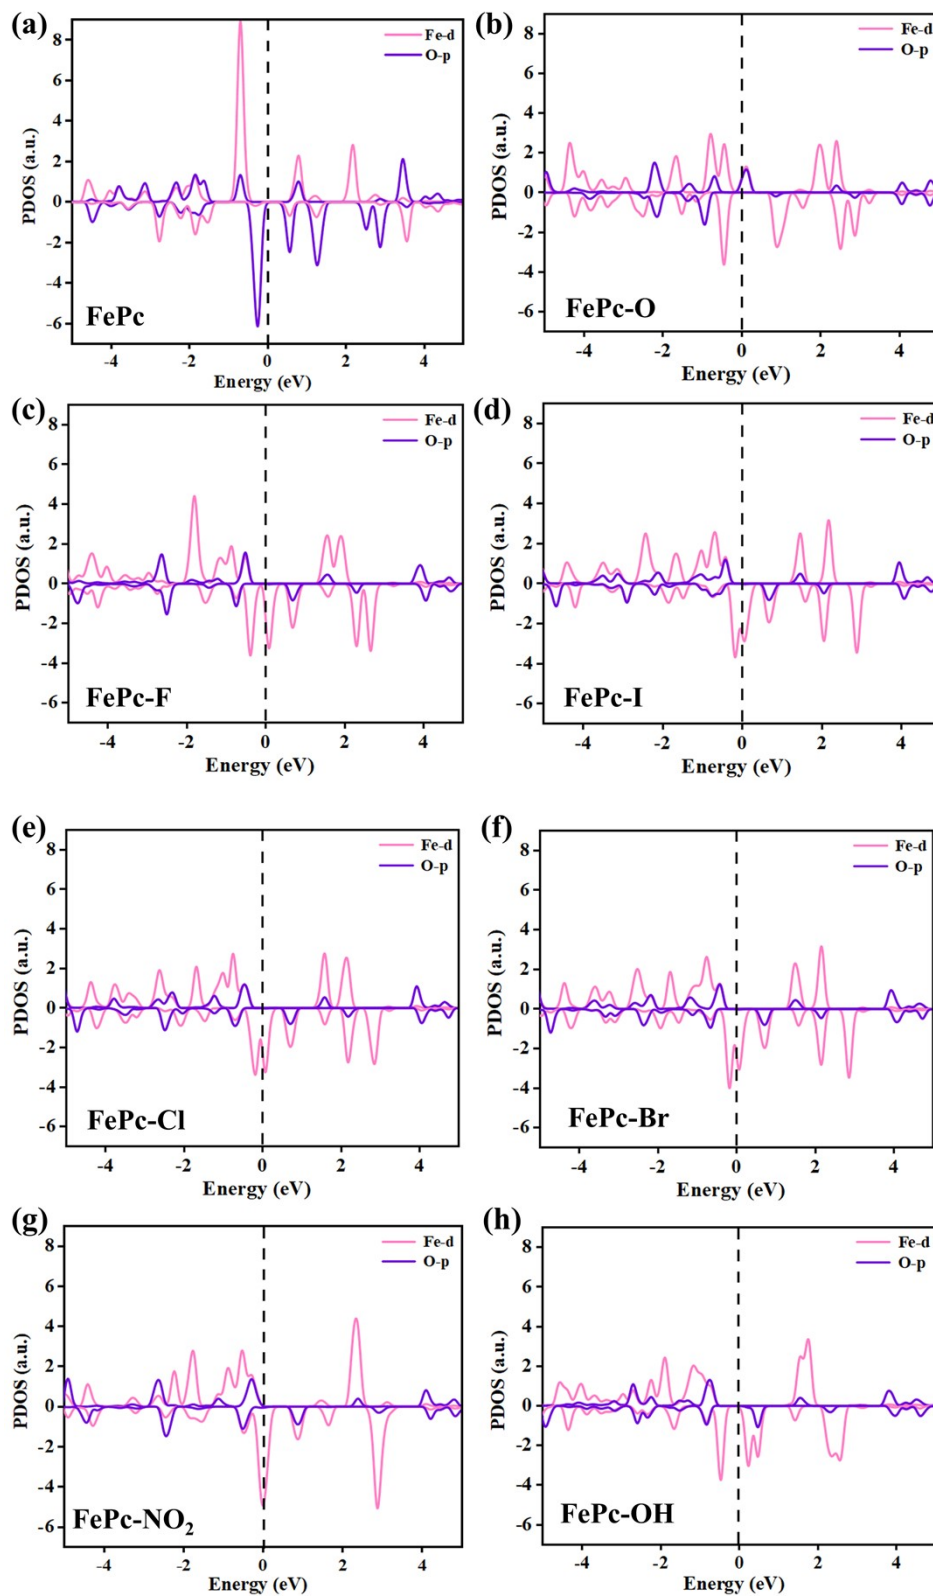

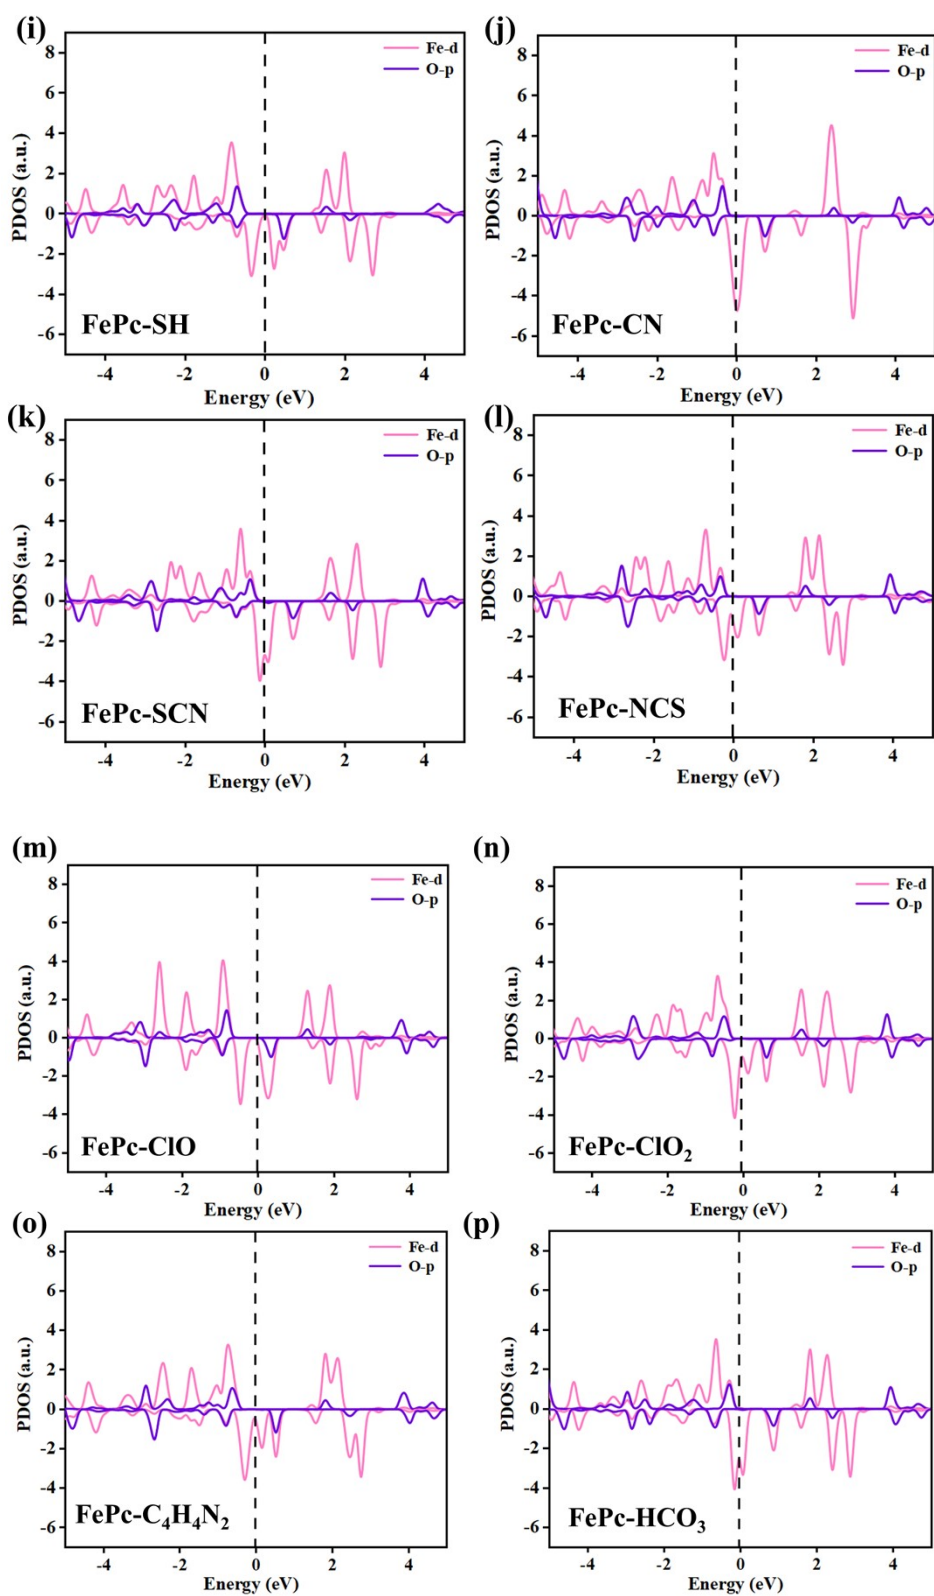

**Figure S4.** Partial density of states (PDOS) of Fe-3d orbitals and O-2p orbitals after OOH\* bonded on FePc and FePc-Xs.

**Table S1.** The calculated total energies (E) and thermodynamic quantities for the gasphase H<sub>2</sub> species (T = 298.15 K, P = 1 bar), and free H<sub>2</sub>O at the 298.15 K, 0.035 bar.

| Species             | E (eV) | ZPE-TS (eV) | G (eV) |
|---------------------|--------|-------------|--------|
| H <sub>2</sub> (g)  | -6.76  | -0.05       | -6.80  |
| H <sub>2</sub> O(g) | 14.22  | -0.00       | 14.22  |

**Table S2.** Calculated results of the binding length of Fe-N/X ( $d_{\text{Fe-N}}$  and  $d_{\text{Fe-X}}$ , in units of Å), and optimized distance between Fe atom and catalyst plane ( $h$ , in units of Å) of optimized catalysts.

| Structure                                         | $d_{\text{Fe-N}}$ | $d_{\text{Fe-X}}$ | $h$   |
|---------------------------------------------------|-------------------|-------------------|-------|
| FePc                                              | 1.93              | ---               | 0.00  |
| FePc-O                                            | 1.95              | 1.64              | -0.29 |
| FePc-F                                            | 1.96              | 1.84              | -0.31 |
| FePc-Cl                                           | 1.96              | 2.24              | -0.30 |
| FePc-Br                                           | 1.96              | 2.40              | -0.28 |
| FePc-I                                            | 1.93              | 2.49              | -0.15 |
| FePc-OH                                           | 1.94              | 1.79              | -0.20 |
| FePc-SH                                           | 1.94              | 2.13              | -0.19 |
| FePc-CN                                           | 1.93              | 1.83              | -0.13 |
| FePc-SCN                                          | 1.94              | 2.38              | -0.23 |
| FePc-NCS                                          | 1.96              | 1.92              | -0.27 |
| FePc-ClO                                          | 1.96              | 1.92              | -0.23 |
| FePc-ClO <sub>2</sub>                             | 1.95              | 2.00              | -0.27 |
| FePc-HCO <sub>3</sub>                             | 1.96              | 1.91              | -0.25 |
| FePc-NO <sub>2</sub>                              | 1.95              | 1.88              | -0.18 |
| FePc-C <sub>4</sub> H <sub>4</sub> N <sub>2</sub> | 1.96              | 2.00              | -0.23 |

**Table S3.** Optimized modes of pristine FePc and axially coordinated FePc-Xs configurations (\*) and their corresponding OH\*, O\* and OOH\* adsorption configurations.

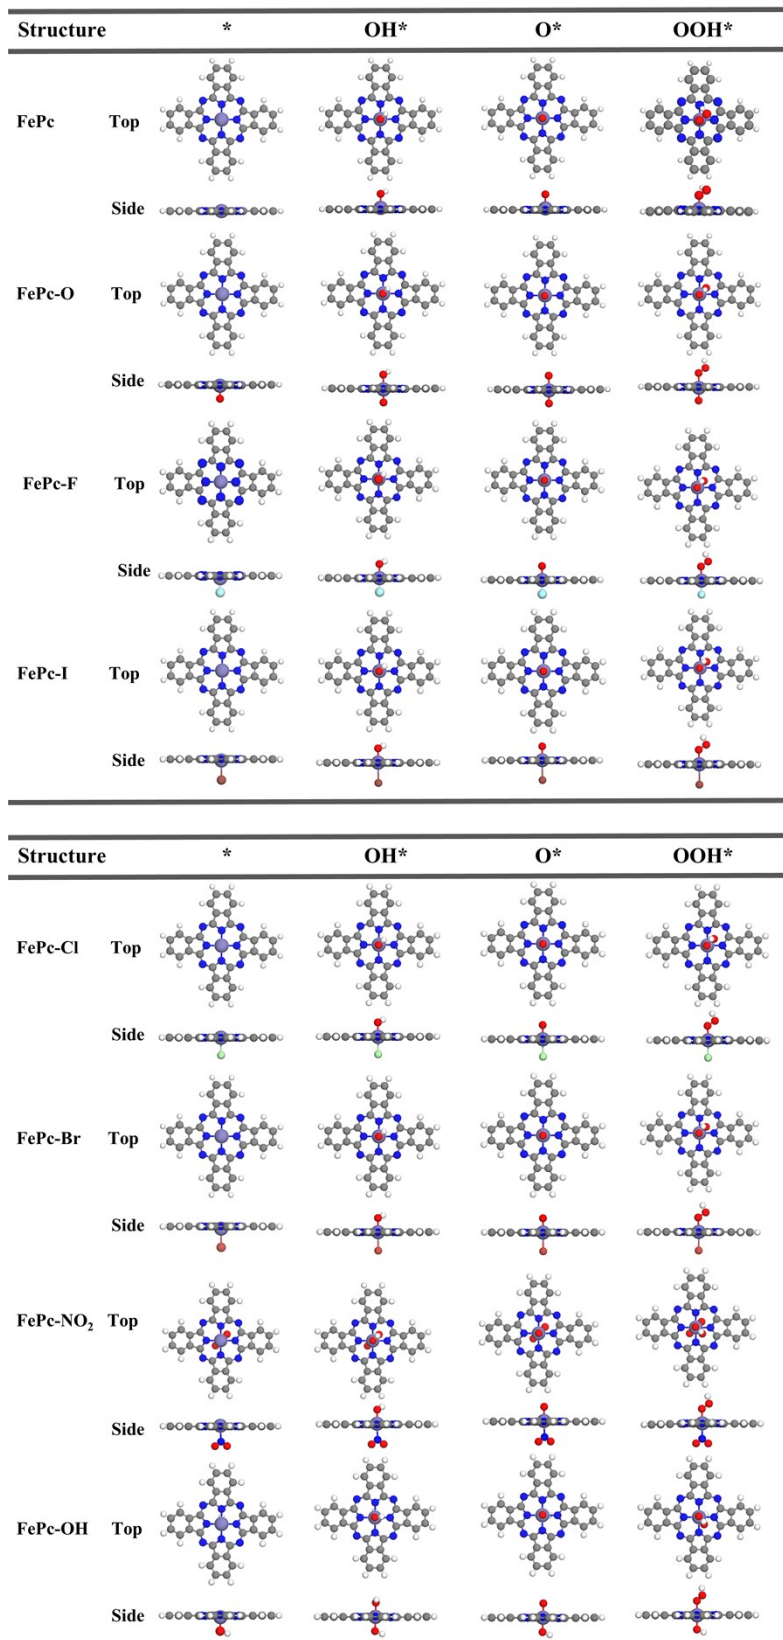



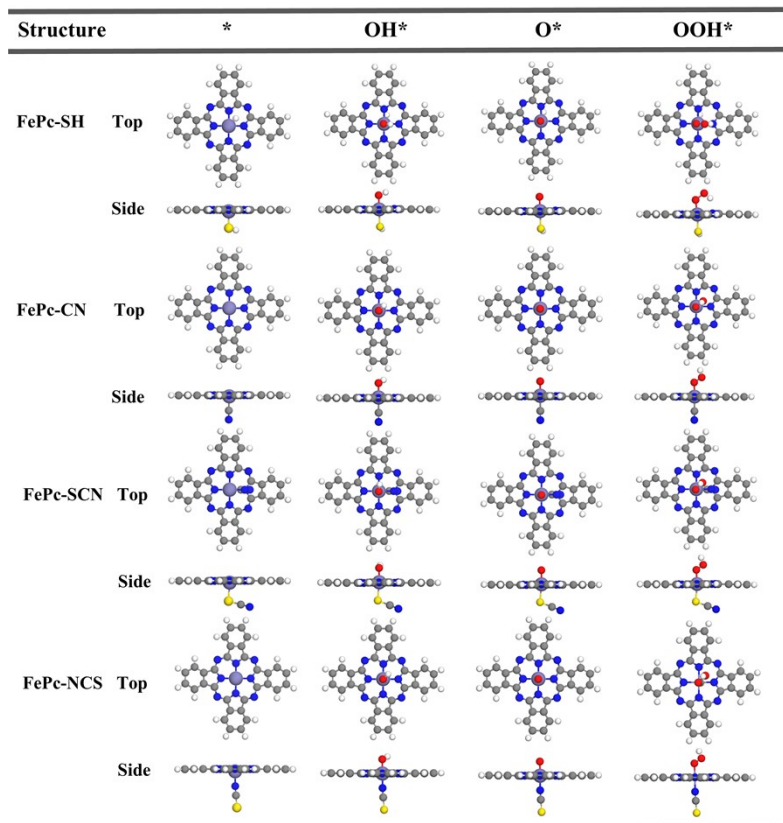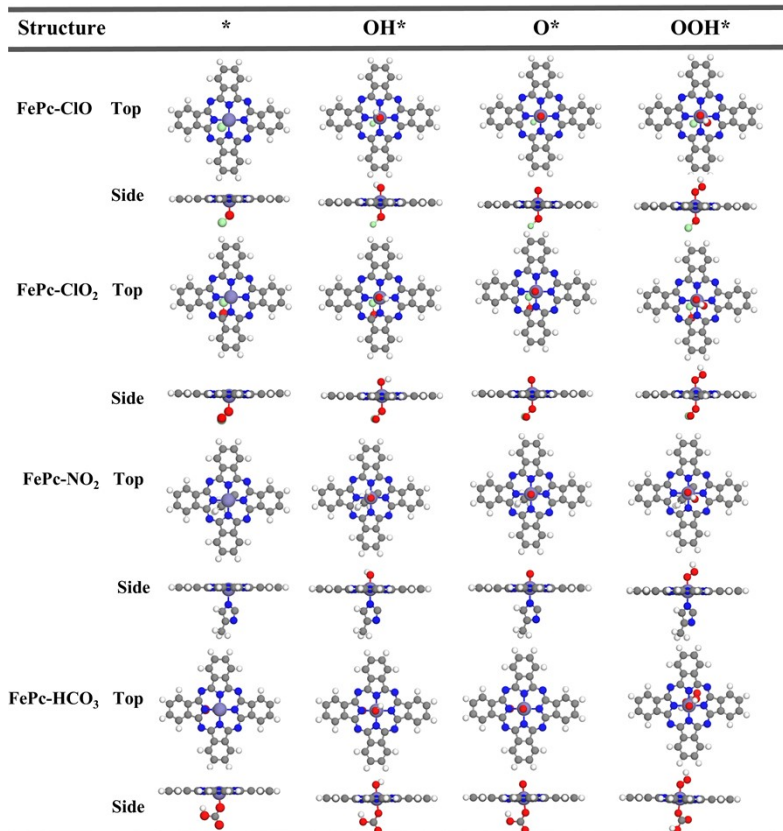

**Table S4.** The calculated Gibbs free energy variations ( $\Delta G_1$ ,  $\Delta G_2$ ,  $\Delta G_3$ , and  $\Delta G_4$ ) and overpotentials of the pristine FePc and axially coordinated FePc-Xs.

| <b>Structure</b>                                    | <b><math>\Delta G_1</math></b> | <b><math>\Delta G_2</math></b> | <b><math>\Delta G_3</math></b> | <b><math>\Delta G_4</math></b> | <b><math>\eta^{\text{OER}}</math></b> |
|-----------------------------------------------------|--------------------------------|--------------------------------|--------------------------------|--------------------------------|---------------------------------------|
| <b>FePc</b>                                         | <b>0.72</b>                    | <b>0.74</b>                    | <b>2.12</b>                    | <b>1.34</b>                    | <b>0.89</b>                           |
| <b>FePc-O</b>                                       | <b>1.59</b>                    | <b>1.60</b>                    | <b>1.25</b>                    | <b>0.48</b>                    | <b>0.37</b>                           |
| <b>FePc-F</b>                                       | <b>0.87</b>                    | <b>1.48</b>                    | <b>1.66</b>                    | <b>0.91</b>                    | <b>0.43</b>                           |
| <b>FePc-Cl</b>                                      | <b>1.07</b>                    | <b>1.36</b>                    | <b>1.65</b>                    | <b>0.84</b>                    | <b>0.42</b>                           |
| <b>FePc-Br</b>                                      | <b>1.08</b>                    | <b>1.34</b>                    | <b>1.67</b>                    | <b>0.83</b>                    | <b>0.44</b>                           |
| <b>FePc-I</b>                                       | <b>0.89</b>                    | <b>1.33</b>                    | <b>1.66</b>                    | <b>1.04</b>                    | <b>0.43</b>                           |
| <b>FePc-OH</b>                                      | <b>0.75</b>                    | <b>1.56</b>                    | <b>1.53</b>                    | <b>1.08</b>                    | <b>0.33</b>                           |
| <b>FePc-SH</b>                                      | <b>1.08</b>                    | <b>1.52</b>                    | <b>1.41</b>                    | <b>0.91</b>                    | <b>0.29</b>                           |
| <b>FePc-CN</b>                                      | <b>1.13</b>                    | <b>1.46</b>                    | <b>1.45</b>                    | <b>0.88</b>                    | <b>0.23</b>                           |
| <b>FePc-SCN</b>                                     | <b>0.94</b>                    | <b>1.31</b>                    | <b>1.68</b>                    | <b>0.99</b>                    | <b>0.45</b>                           |
| <b>FePc-NCS</b>                                     | <b>0.92</b>                    | <b>1.39</b>                    | <b>1.62</b>                    | <b>0.99</b>                    | <b>0.39</b>                           |
| <b>FePc-CIO</b>                                     | <b>0.83</b>                    | <b>1.39</b>                    | <b>1.62</b>                    | <b>1.08</b>                    | <b>0.39</b>                           |
| <b>FePc-CIO<sub>2</sub></b>                         | <b>0.85</b>                    | <b>1.62</b>                    | <b>1.38</b>                    | <b>1.07</b>                    | <b>0.39</b>                           |
| <b>FePc-HCO<sub>3</sub></b>                         | <b>1.01</b>                    | <b>1.03</b>                    | <b>1.74</b>                    | <b>1.14</b>                    | <b>0.51</b>                           |
| <b>FePc-NO<sub>2</sub></b>                          | <b>1.19</b>                    | <b>1.33</b>                    | <b>1.59</b>                    | <b>0.81</b>                    | <b>0.36</b>                           |
| <b>FePc-C<sub>4</sub>H<sub>4</sub>N<sub>2</sub></b> | <b>0.61</b>                    | <b>1.38</b>                    | <b>1.62</b>                    | <b>1.31</b>                    | <b>0.39</b>                           |

**Table S5.** The calculated Bader charge and *d*-band center of optimized models of FePc and FePc-Xs with bonding of OOH.

| Structure                                         | Bader Charge (e) |                |                                   | <i>d</i> -band center (eV) |
|---------------------------------------------------|------------------|----------------|-----------------------------------|----------------------------|
|                                                   | Q <sub>Fe</sub>  | Q <sub>X</sub> | Q <sub>Fe</sub>  - Q <sub>X</sub> |                            |
| FePc                                              | 1.26             | /              | 1.26                              | -0.64                      |
| FePc-O                                            | 1.44             | -0.54          | 0.90                              | -0.71                      |
| FePc-F                                            | 1.51             | -0.59          | 0.92                              | -0.85                      |
| FePc-Cl                                           | 1.35             | -0.42          | 0.93                              | -0.83                      |
| FePc-Br                                           | 1.35             | -0.39          | 0.96                              | -0.85                      |
| FePc-I                                            | 1.30             | -0.28          | 1.02                              | -0.92                      |
| FePc-OH                                           | 1.46             | -0.40          | 1.06                              | -1.00                      |
| FePc-SH                                           | 1.29             | -0.19          | 1.10                              | -0.99                      |
| FePc-CN                                           | 1.28             | -0.47          | 0.81                              | -0.77                      |
| FePc-SCN                                          | 1.30             | -0.40          | 0.90                              | -0.84                      |
| FePc-NCS                                          | 1.44             | -0.48          | 0.96                              | -0.91                      |
| FePc-CIO                                          | 1.41             | -0.36          | 1.05                              | -1.12                      |
| FePc-CIO <sub>2</sub>                             | 1.43             | -0.37          | 1.06                              | -0.82                      |
| FePc-HCO <sub>3</sub>                             | 1.36             | -0.61          | 0.75                              | -0.79                      |
| FePc-NO <sub>2</sub>                              | 1.39             | -0.53          | 0.86                              | -0.75                      |
| FePc-C <sub>4</sub> H <sub>4</sub> N <sub>2</sub> | 1.42             | -0.30          | 1.12                              | -0.93                      |

**Table S6.** The calculated ICOHP of Fe-O bonds during binding with OH, O and OOH and bonding lengths of Fe and OOH for both pristine FePc and FePc-Xs.

| Structure                                         | ICOHP (eV) |       |       | Fe-OOH*(Å) |
|---------------------------------------------------|------------|-------|-------|------------|
|                                                   | OH*        | O*    | OOH*  |            |
| FePc                                              | -1.70      | -2.86 | -2.00 | 1.75       |
| FePc-O                                            | -1.27      | -2.63 | -1.19 | 1.94       |
| FePc-F                                            | -1.61      | -2.95 | -1.60 | 1.84       |
| FePc-Cl                                           | -1.52      | -2.85 | -1.53 | 1.85       |
| FePc-Br                                           | -1.50      | -2.82 | -1.50 | 1.85       |
| FePc-I                                            | -1.01      | -2.21 | -0.98 | 1.86       |
| FePc-OH                                           | -1.54      | -2.83 | -1.50 | 1.86       |
| FePc-SH                                           | -1.42      | -2.70 | -1.34 | 1.89       |
| FePc-CN                                           | -1.43      | -2.47 | -1.36 | 1.88       |
| FePc-SCN                                          | -1.51      | -2.78 | -1.51 | 1.85       |
| FePc-NCS                                          | -1.57      | -2.88 | -1.63 | 1.84       |
| FePc-CIO                                          | -1.55      | -2.85 | -1.55 | 1.85       |
| FePc-CIO <sub>2</sub>                             | -1.59      | -2.88 | -1.69 | 1.82       |
| FePc-HCO <sub>3</sub>                             | -1.58      | -2.93 | -1.68 | 1.83       |
| FePc-NO <sub>2</sub>                              | -1.48      | -2.65 | -1.42 | 1.87       |
| FePc-C <sub>4</sub> H <sub>4</sub> N <sub>2</sub> | -1.59      | -2.77 | -1.59 | 1.84       |
